# Supplementary material
Source: PubMed Central journal article supplement (PMC8320492)
Supplement: jcsm.9072.ds001.pdf [file jcsm.9072.ds001.pdf]

**Table S1. Mean (standard deviation) sleep characteristics at baseline and follow-up by age at the baseline groups.**

| Age                                          | Total       | Baseline Women | Men         | p*     | Total       | Follow-up Women | Men         | p*     |
|----------------------------------------------|-------------|----------------|-------------|--------|-------------|-----------------|-------------|--------|
| <b>Pittsburgh sleep quality index, score</b> |             |                |             |        |             |                 |             |        |
| [40,45)                                      | 4.0 (2.1)   | 4.0 (2.1)      | 3.9 (2.1)   | 0.183  | 4.8 (2.6)   | 5.1 (2.7)       | 4.5 (2.4)   | 0.005  |
| [45,50)                                      | 4.2 (2.4)   | 4.4 (2.5)      | 4.0 (2.3)   | <0.001 | 4.8 (2.7)   | 5.2 (2.9)       | 4.4 (2.4)   | <0.001 |
| [50,55)                                      | 4.1 (2.3)   | 4.3 (2.4)      | 3.9 (2.1)   | 0.028  | 4.7 (2.8)   | 4.9 (2.9)       | 4.5 (2.8)   | 0.167  |
| [55,60)                                      | 4.6 (2.4)   | 4.9 (2.7)      | 4.2 (2.1)   | 0.033  | 5.1 (3.0)   | 5.9 (3.3)       | 4.3 (2.5)   | <0.001 |
| [60,65)                                      | 4.3 (2.3)   | 4.8 (2.4)      | 3.9 (2.2)   | 0.003  | 5.4 (3.4)   | 5.9 (3.3)       | 5.0 (3.5)   | 0.012  |
| [65,72]                                      | 5.1 (2.6)   | 5.2 (2.3)      | 5.1 (3.0)   | 0.624  | 5.8 (3.6)   | 6.5 (4.1)       | 4.8 (2.6)   | 0.031  |
| <b>Sleep latency, min</b>                    |             |                |             |        |             |                 |             |        |
| [40,45)                                      | 14.9 (15.1) | 14.9 (16.2)    | 14.8 (13.9) | 0.139  | 15.7 (19.3) | 17.7 (21.4)     | 13.6 (16.5) | <0.001 |
| [45,50)                                      | 15.9 (16.8) | 16.7 (19.5)    | 15.1 (13.6) | <0.001 | 16.1 (22.3) | 19.1 (26.5)     | 13.2 (16.6) | <0.001 |
| [50,55)                                      | 14.8 (13.6) | 16.4 (15.0)    | 13.3 (11.9) | 0.013  | 16.6 (19.1) | 20.5 (21.7)     | 12.8 (15.4) | 0.001  |
| [55,60)                                      | 17.5 (17.1) | 20.3 (17.3)    | 14.6 (16.3) | 0.037  | 18.7 (22.5) | 22.9 (26.8)     | 14.4 (16.2) | <0.001 |
| [60,65)                                      | 17.1 (20.9) | 19.5 (24.5)    | 15.0 (17.0) | 0.162  | 20.7 (28.0) | 25.0 (35.2)     | 17.0 (19.1) | 0.060  |
| [65,72]                                      | 21.8 (26.6) | 19.7 (16.4)    | 24.7 (36.4) | 0.180  | 26.0 (29.4) | 30.3 (33.7)     | 20.0 (20.9) | 0.086  |
| <b>Habitual sleep efficiency, %</b>          |             |                |             |        |             |                 |             |        |
| [40,45)                                      | 96.0 (9.4)  | 97.2 (9.5)     | 94.8 (9.2)  | 0.312  | 92.2 (9.6)  | 90.6 (10.6)     | 94.0 (8.1)  | <0.001 |
| [45,50)                                      | 94.8 (10.0) | 94.7 (10.6)    | 94.9 (9.3)  | 0.792  | 91.1 (10.9) | 89.7 (11.4)     | 92.4 (10.2) | <0.001 |
| [50,55)                                      | 93.6 (10.7) | 93.9 (10.7)    | 93.3 (10.8) | 0.667  | 90.4 (11.3) | 89.5 (11.8)     | 91.4 (10.8) | 0.422  |
| [55,60)                                      | 92.3 (11.4) | 91.5 (12.8)    | 93.2 (9.7)  | 0.103  | 88.6 (13.1) | 85.8 (14.5)     | 91.6 (10.7) | <0.001 |
| [60,65)                                      | 92.6 (10.8) | 91.7 (12.1)    | 93.4 (9.6)  | 0.228  | 85.3 (14.7) | 84.7 (14.0)     | 85.8 (15.4) | 0.453  |
| [65,72]                                      | 88.9 (15.3) | 88.8 (14.7)    | 89.1 (16.2) | 0.298  | 84.1 (16.6) | 82.0 (17.6)     | 87.0 (14.6) | 0.010  |
| <b>Time in bed, 24H</b>                      |             |                |             |        |             |                 |             |        |
| [40,45)                                      | 6:44 (1:11) | 6:38 (1:17)    | 6:50 (1:02) | 0.129  | 6:51 (1:03) | 6:54 (1:02)     | 6:48 (1:03) | 0.083  |
| [45,50)                                      | 6:42 (1:09) | 6:33 (1:10)    | 6:52 (1:06) | <0.001 | 6:57 (1:10) | 6:57 (1:15)     | 6:57 (1:05) | 0.788  |
| [50,55)                                      | 6:50 (1:17) | 6:43 (1:26)    | 6:56 (1:07) | 0.105  | 7:04 (1:07) | 7:03 (1:04)     | 7:04 (1:09) | 0.291  |
| [55,60)                                      | 6:45 (1:08) | 6:38 (1:09)    | 6:52 (1:06) | 0.971  | 7:12 (1:09) | 7:07 (1:13)     | 7:18 (1:05) | 0.634  |
| [60,65)                                      | 6:41 (1:15) | 6:41 (1:20)    | 6:41 (1:10) | 0.809  | 7:18 (1:45) | 7:04 (1:12)     | 7:31 (2:07) | 0.021  |
| [65,72]                                      | 6:45 (1:17) | 6:52 (1:26)    | 6:34 (1:03) | 0.118  | 7:12 (1:18) | 7:05 (1:21)     | 7:22 (1:14) | 0.697  |
| <b>Sleep duration, 24H</b>                   |             |                |             |        |             |                 |             |        |
| [40,45)                                      | 6:26 (1:05) | 6:24 (1:04)    | 6:27 (1:06) | 0.186  | 6:18 (1:05) | 6:14 (1:08)     | 6:23 (1:01) | 0.291  |
| [45,50)                                      | 6:20 (1:10) | 6:11 (1:14)    | 6:30 (1:06) | 0.001  | 6:18 (1:09) | 6:12 (1:12)     | 6:24 (1:06) | 0.002  |
| [50,55)                                      | 6:22 (1:13) | 6:16 (1:10)    | 6:28 (1:15) | 0.207  | 6:22 (1:10) | 6:17 (1:08)     | 6:26 (1:11) | 0.116  |
| [55,60)                                      | 6:13 (1:14) | 6:03 (1:15)    | 6:23 (1:12) | 0.248  | 6:20 (1:12) | 6:03 (1:13)     | 6:39 (1:06) | 0.004  |

| Age                                    | Total        | Baseline Women | Men          | p*           | Total        | Follow-up Women | Men          | p*           |
|----------------------------------------|--------------|----------------|--------------|--------------|--------------|-----------------|--------------|--------------|
| [60,65)                                | 6:09 (1:10)  | 6:04 (1:15)    | 6:13 (1:05)  | 0.325        | 6:07 (1:15)  | 5:56 (1:14)     | 6:17 (1:15)  | <b>0.015</b> |
| [65,72]                                | 5:56 (1:20)  | 6:01 (1:20)    | 5:49 (1:19)  | 0.697        | 6:00 (1:24)  | 5:44 (1:25)     | 6:21 (1:20)  | <b>0.009</b> |
| <b>Bedtime (free days), 24H</b>        |              |                |              |              |              |                 |              |              |
| [40,45)                                | 0:08 (1:15)  | 0:04 (1:18)    | 0:13 (1:12)  | 0.703        | 23:34 (1:19) | 23:34 (1:14)    | 23:34 (1:25) | 0.864        |
| [45,50)                                | 23:54 (1:15) | 23:54 (1:08)   | 23:55 (1:21) | <b>0.006</b> | 23:15 (1:27) | 23:19 (1:25)    | 23:10 (1:28) | <b>0.043</b> |
| [50,55)                                | 23:36 (1:20) | 23:38 (1:27)   | 23:34 (1:11) | 0.849        | 22:53 (1:22) | 22:52 (1:12)    | 22:54 (1:31) | 0.782        |
| [55,60)                                | 23:24 (1:16) | 23:23 (1:11)   | 23:24 (1:20) | 0.312        | 22:36 (1:10) | 22:41 (1:11)    | 22:31 (1:09) | 0.416        |
| [60,65)                                | 22:57 (1:12) | 22:49 (1:01)   | 23:05 (1:21) | 0.901        | 22:35 (1:37) | 22:27 (1:11)    | 22:42 (1:56) | 0.242        |
| [65,72]                                | 22:48 (1:16) | 22:42 (1:23)   | 22:57 (1:04) | 0.949        | 22:26 (1:18) | 22:34 (1:14)    | 22:15 (1:22) | 0.143        |
| <b>Wake-up time (free days), 24H</b>   |              |                |              |              |              |                 |              |              |
| [40,45)                                | 7:18 (1:49)  | 7:24 (1:27)    | 7:11 (2:08)  | 0.477        | 6:34 (1:46)  | 6:49 (1:20)     | 6:18 (2:06)  | <b>0.001</b> |
| [45,50)                                | 6:57 (1:41)  | 6:54 (1:23)    | 7:00 (1:56)  | 0.108        | 6:15 (1:34)  | 6:22 (1:27)     | 6:08 (1:40)  | <b>0.014</b> |
| [50,55)                                | 6:31 (1:27)  | 6:29 (1:20)    | 6:33 (1:34)  | 0.630        | 6:03 (1:26)  | 5:59 (1:17)     | 6:07 (1:34)  | 0.178        |
| [55,60)                                | 6:14 (1:17)  | 6:06 (1:11)    | 6:22 (1:22)  | 0.367        | 5:53 (1:13)  | 5:54 (1:13)     | 5:51 (1:14)  | 0.954        |
| [60,65)                                | 5:40 (1:15)  | 5:33 (1:07)    | 5:47 (1:21)  | 0.911        | 5:40 (1:11)  | 5:33 (1:07)     | 5:45 (1:14)  | 0.488        |
| [65,72]                                | 5:38 (1:14)  | 5:41 (1:20)    | 5:33 (1:06)  | <b>0.031</b> | 5:40 (1:19)  | 5:42 (1:27)     | 5:37 (1:06)  | 0.239        |
| <b>Mid-sleep time (free days), 24H</b> |              |                |              |              |              |                 |              |              |
| [40,45)                                | 3:44 (1:12)  | 3:42 (1:09)    | 3:47 (1:15)  | 0.667        | 3:06 (1:16)  | 3:11 (1:07)     | 3:01 (1:24)  | <b>0.035</b> |
| [45,50)                                | 3:27 (1:10)  | 3:24 (1:04)    | 3:31 (1:16)  | <b>0.037</b> | 2:45 (1:19)  | 2:49 (1:15)     | 2:40 (1:22)  | <b>0.021</b> |
| [50,55)                                | 3:03 (1:11)  | 3:00 (1:14)    | 3:07 (1:09)  | 0.934        | 2:30 (1:22)  | 2:29 (1:18)     | 2:30 (1:25)  | 0.819        |
| [55,60)                                | 2:49 (1:07)  | 2:44 (1:01)    | 2:53 (1:12)  | 0.275        | 2:14 (1:02)  | 2:18 (1:02)     | 2:11 (1:03)  | 0.673        |
| [60,65)                                | 2:19 (1:02)  | 2:11 (0:49)    | 2:26 (1:11)  | 0.889        | 2:00 (1:21)  | 2:00 (0:59)     | 1:59 (1:36)  | 0.366        |
| [65,72]                                | 2:13 (1:03)  | 2:11 (1:08)    | 2:15 (0:55)  | 0.227        | 2:03 (1:08)  | 2:08 (1:10)     | 1:56 (1:04)  | 0.130        |
| <b>Bedtime (workdays), 24H</b>         |              |                |              |              |              |                 |              |              |
| [40,45)                                | 23:58 (1:12) | 23:57 (1:13)   | 23:58 (1:12) | 0.320        | 23:28 (1:19) | 23:29 (1:14)    | 23:28 (1:24) | 0.816        |
| [45,50)                                | 23:47 (1:11) | 23:48 (1:07)   | 23:45 (1:15) | <b>0.002</b> | 23:08 (1:16) | 23:13 (1:15)    | 23:04 (1:18) | <b>0.050</b> |
| [50,55)                                | 23:30 (1:21) | 23:32 (1:22)   | 23:28 (1:20) | 0.544        | 22:51 (1:23) | 22:50 (1:16)    | 22:53 (1:30) | 0.778        |
| [55,60)                                | 23:15 (1:13) | 23:14 (1:09)   | 23:16 (1:17) | 0.177        | 22:35 (1:10) | 22:39 (1:10)    | 22:31 (1:11) | 0.290        |
| [60,65)                                | 22:53 (1:10) | 22:49 (1:02)   | 22:56 (1:16) | 0.912        | 22:33 (1:36) | 22:25 (1:10)    | 22:40 (1:54) | 0.224        |
| [65,72]                                | 22:43 (1:15) | 22:38 (1:20)   | 22:50 (1:06) | 0.826        | 22:26 (1:18) | 22:34 (1:14)    | 22:15 (1:22) | 0.143        |
| <b>Wake-up time (workdays), 24H</b>    |              |                |              |              |              |                 |              |              |
| [40,45)                                | 6:25 (1:18)  | 6:13 (0:54)    | 6:37 (1:36)  | <b>0.033</b> | 6:05 (1:44)  | 6:15 (1:17)     | 5:54 (2:06)  | <b>0.021</b> |
| [45,50)                                | 6:19 (1:19)  | 6:10 (1:08)    | 6:28 (1:28)  | 0.548        | 5:59 (1:26)  | 6:07 (1:15)     | 5:51 (1:35)  | <b>0.006</b> |
| [50,55)                                | 6:09 (1:23)  | 6:04 (1:09)    | 6:14 (1:34)  | 0.252        | 5:52 (1:20)  | 5:50 (1:12)     | 5:54 (1:28)  | 0.594        |
| [55,60)                                | 5:59 (1:07)  | 5:52 (1:03)    | 6:07 (1:10)  | 0.120        | 5:46 (1:11)  | 5:45 (1:13)     | 5:48 (1:10)  | 0.466        |

| Age                                                                     | Total       | Baseline Women | Men         | p*           | Total       | Follow-up Women | Men         | p*           |
|-------------------------------------------------------------------------|-------------|----------------|-------------|--------------|-------------|-----------------|-------------|--------------|
| [60,65]                                                                 | 5:34 (1:12) | 5:30 (1:10)    | 5:38 (1:13) | 0.647        | 5:35 (1:08) | 5:28 (1:07)     | 5:41 (1:09) | 0.498        |
| [65,72]                                                                 | 5:26 (1:03) | 5:27 (1:07)    | 5:23 (0:58) | <b>0.050</b> | 5:38 (1:18) | 5:39 (1:26)     | 5:37 (1:06) | 0.307        |
| <b>Mid-sleep time (workdays), 24H</b>                                   |             |                |             |              |             |                 |             |              |
| [40,45]                                                                 | 3:11 (1:00) | 3:03 (0:51)    | 3:20 (1:07) | 0.189        | 2:51 (1:12) | 2:52 (1:08)     | 2:50 (1:16) | 0.483        |
| [45,50]                                                                 | 3:04 (1:02) | 2:59 (0:56)    | 3:08 (1:07) | 0.249        | 2:35 (1:08) | 2:40 (1:04)     | 2:31 (1:12) | <b>0.028</b> |
| [50,55]                                                                 | 2:49 (1:10) | 2:45 (1:07)    | 2:54 (1:12) | 0.748        | 2:22 (1:14) | 2:20 (1:07)     | 2:23 (1:21) | 0.894        |
| [55,60]                                                                 | 2:37 (1:01) | 2:33 (0:56)    | 2:42 (1:06) | 0.096        | 2:11 (1:01) | 2:12 (1:00)     | 2:09 (1:02) | 0.303        |
| [60,65]                                                                 | 2:14 (0:59) | 2:10 (0:52)    | 2:17 (1:05) | 0.732        | 1:56 (1:18) | 1:57 (0:58)     | 1:56 (1:33) | 0.349        |
| [65,72]                                                                 | 2:04 (0:57) | 2:02 (1:00)    | 2:06 (0:54) | 0.229        | 2:02 (1:07) | 2:07 (1:09)     | 1:56 (1:04) | 0.154        |
| <b>Mid-sleep on free days corrected for sleep debt on workdays, 24H</b> |             |                |             |              |             |                 |             |              |
| [40,45]                                                                 | 3:28 (1:08) | 3:19 (1:04)    | 3:39 (1:11) | 0.077        | 3:00 (1:13) | 3:01 (1:05)     | 2:59 (1:21) | 0.356        |
| [45,50]                                                                 | 3:16 (1:08) | 3:10 (1:00)    | 3:22 (1:14) | 0.208        | 2:45 (1:25) | 2:51 (1:23)     | 2:38 (1:26) | 0.019        |
| [50,55]                                                                 | 2:58 (1:10) | 2:53 (1:14)    | 3:02 (1:05) | 0.551        | 2:25 (1:17) | 2:24 (1:07)     | 2:26 (1:25) | 0.868        |
| [55,60]                                                                 | 2:46 (1:06) | 2:43 (1:02)    | 2:50 (1:10) | 0.240        | 2:13 (1:02) | 2:15 (1:02)     | 2:10 (1:02) | 0.513        |
| [60,65]                                                                 | 2:18 (1:02) | 2:10 (0:48)    | 2:26 (1:12) | 0.774        | 1:59 (1:21) | 1:59 (0:59)     | 1:59 (1:36) | 0.351        |
| [65,72]                                                                 | 2:10 (1:00) | 2:08 (1:04)    | 2:14 (0:54) | 0.353        | 2:02 (1:07) | 2:07 (1:09)     | 1:56 (1:04) | 0.146        |
| <b>Social jet lag, 24H</b>                                              |             |                |             |              |             |                 |             |              |
| [40,45]                                                                 | 0:36 (0:44) | 0:41 (0:43)    | 0:30 (0:45) | 0.033        | 0:20 (0:51) | 0:21 (0:43)     | 0:20 (1:00) | 0.475        |
| [45,50]                                                                 | 0:28 (0:41) | 0:28 (0:38)    | 0:28 (0:43) | 0.229        | 0:15 (0:46) | 0:17 (0:55)     | 0:13 (0:34) | 0.284        |
| [50,55]                                                                 | 0:18 (0:42) | 0:18 (0:32)    | 0:19 (0:50) | 0.757        | 0:10 (0:37) | 0:12 (0:47)     | 0:09 (0:24) | 0.741        |
| [55,60]                                                                 | 0:13 (0:27) | 0:14 (0:27)    | 0:13 (0:27) | <b>0.048</b> | 0:05 (0:18) | 0:06 (0:19)     | 0:04 (0:17) | 0.065        |
| [60,65]                                                                 | 0:09 (0:24) | 0:05 (0:18)    | 0:12 (0:28) | 0.756        | 0:03 (0:17) | 0:03 (0:18)     | 0:03 (0:16) | 0.925        |
| [65,72]                                                                 | 0:10 (0:23) | 0:09 (0:19)    | 0:11 (0:27) | 0.686        | 0:01 (0:07) | 0:01 (0:10)     | 0:00 (0:00) | 0.366        |

p\* reflects overall group differences between sex by analysis of variance after adjusting for baseline age, body mass index (BMI, kg/m<sup>2</sup>), smoking intensity (pack-year), alcohol consumption amount (g/day), hypertension, and diabetes mellitus, occupation.

**Table S2.** Mean (standard deviation) sleep characteristics at baseline by menopausal status in women.

|                         | <b>Pre-menopause</b><br>(N=728, 54.5%) | <b>Menopause</b><br>(N=607, 45.5%) | <b>p*</b>        | <b>p**</b>   |
|-------------------------|----------------------------------------|------------------------------------|------------------|--------------|
| Age at baseline         | 45.44 (3.03)                           | 55.07 (6.62)                       | <b>&lt;0.001</b> | -            |
| PSQI, score             | 4.1 (2.3)                              | 4.7 (2.6)                          | <b>&lt;0.001</b> | 0.268        |
| Sleep latency, min      | 15.2 (16.4)                            | 19.1 (19.7)                        | <b>&lt;0.001</b> | <b>0.018</b> |
| HSE, %                  | 95.8 (10.1)                            | 92.5 (12.2)                        | <b>&lt;0.001</b> | 0.487        |
| Time in bed, 24H        | 6:35 (1:14)                            | 6:42 (1:18)                        | 0.068            | 0.190        |
| Sleep duration, 24H     | 6:16 (1:09)                            | 6:10 (1:14)                        | 0.095            | 0.377        |
| MSFsc, 24H              | 3:13 (1:04)                            | 2:42 (1:06)                        | <b>&lt;0.001</b> | 0.881        |
| Mid-sleep time (F), 24H | 3:31 (1:08)                            | 2:48 (1:10)                        | <b>&lt;0.001</b> | 0.750        |
| Mid-sleep time (W), 24H | 3:00 (0:54)                            | 2:35 (1:02)                        | <b>&lt;0.001</b> | 0.290        |
| Social jet lag, 24H     | 0:35 (0:41)                            | 0:15 (0:29)                        | <b>&lt;0.001</b> | <b>0.005</b> |

The final column reflects overall group differences between menopausal status covariates of body mass index (BMI, kg/m<sup>2</sup>), smoking intensity (pack·year), alcohol consumption amount (g/day), hypertension diabetes mellitus, occupation with\*\* or without\* baseline age.

N, number of observations; PSQI, The Pittsburgh sleep quality index; HSE, habitual sleep efficiency; MSFsc, mid-sleep on free days corrected for sleep debt on workdays; free days (F)/workdays (W).
